# Supplementary material for: Iridoids, Phenolic Compounds and Antioxidant Activity of Edible Honeysuckle Berries (Lonicera caerulea var. kamtschatica Sevast.)
Source: PubMed Central journal article supplement (PMC6155291; doi:10.3390/molecules22030405), 2017-03-05
Supplement: molecules-22-00405-s001.pdf [file molecules-22-00405-s001.pdf]

1 **Supplementary Materials: Iridoids, phenolic**  
2 **compounds and antioxidant activity of edible**  
3 **honeysuckle berries (*Lonicera caerulea* var.**  
4 ***kamtschatica* Sevast.)**

5  
6 Alicja Z. Kucharska, Anna Sokół-Łętowska, Jan Oszmiański, Narcyz Piórecki and Izabela Fecka

7  
8  
9

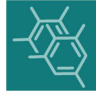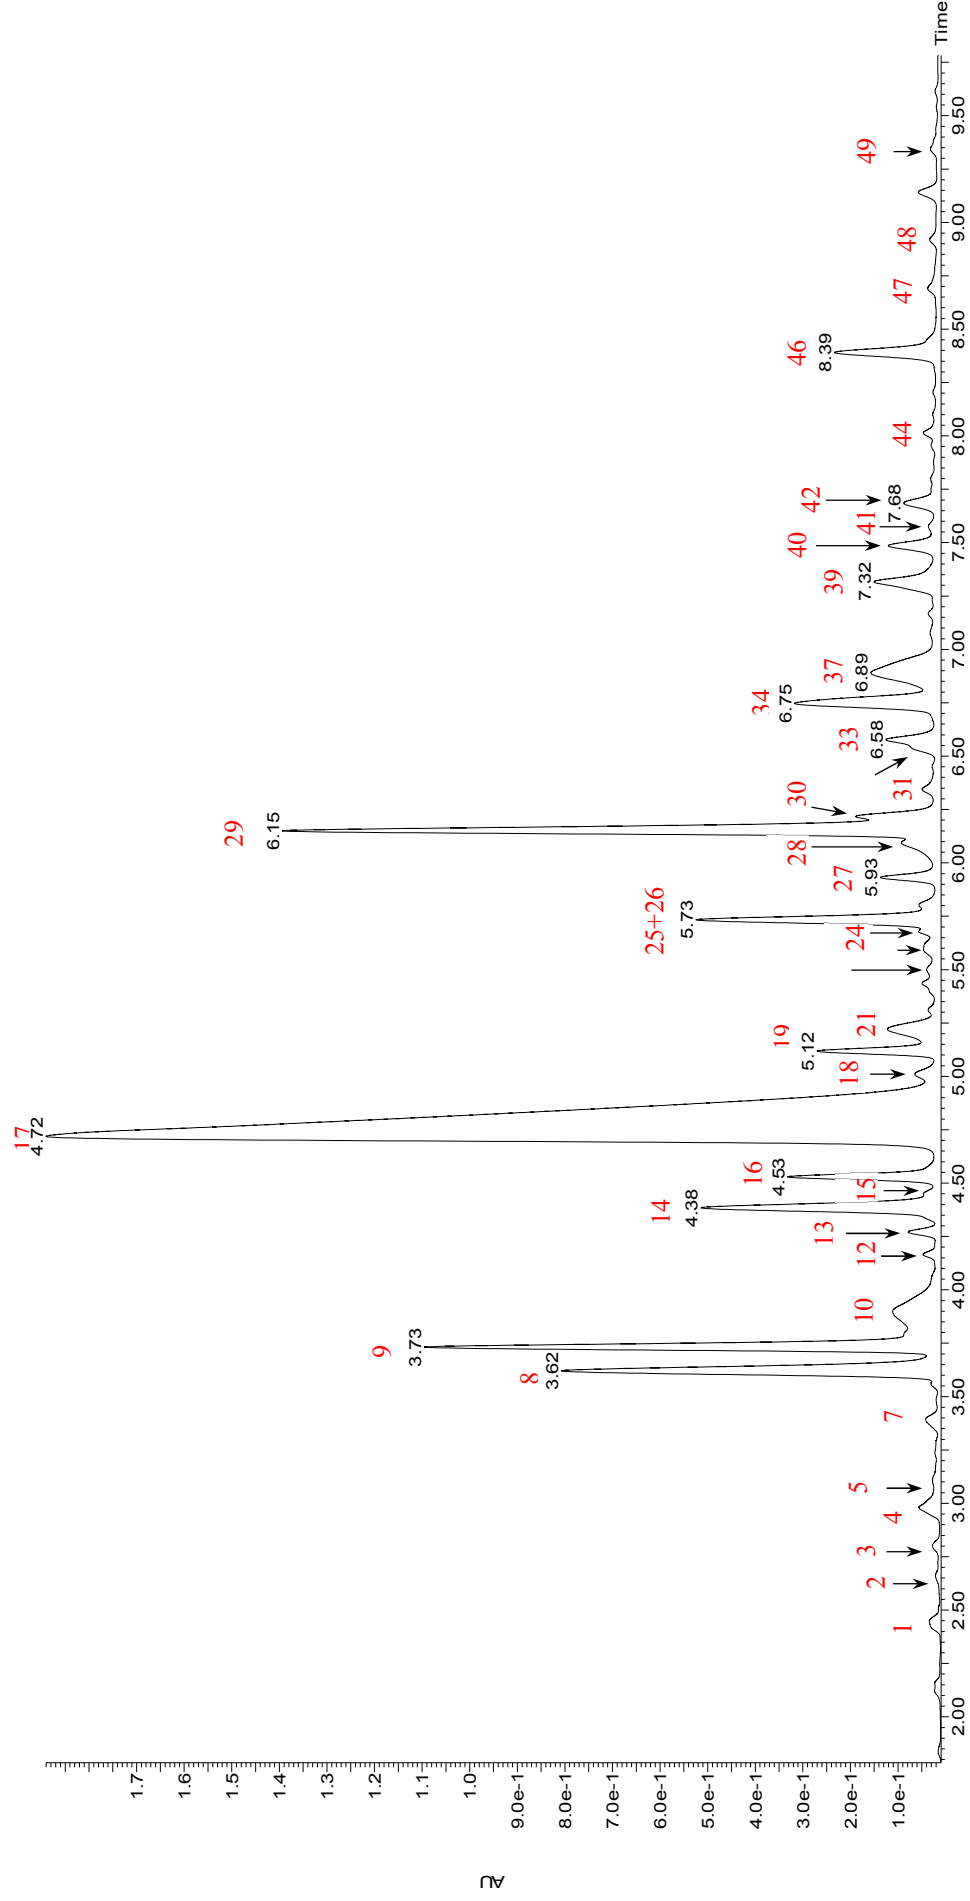

Fig. S1. UPLC-DAD chromatogram (254 nm) of compounds of methanolic extract from honeysuckle berries. The peak number corresponds to the number in Tables 1.

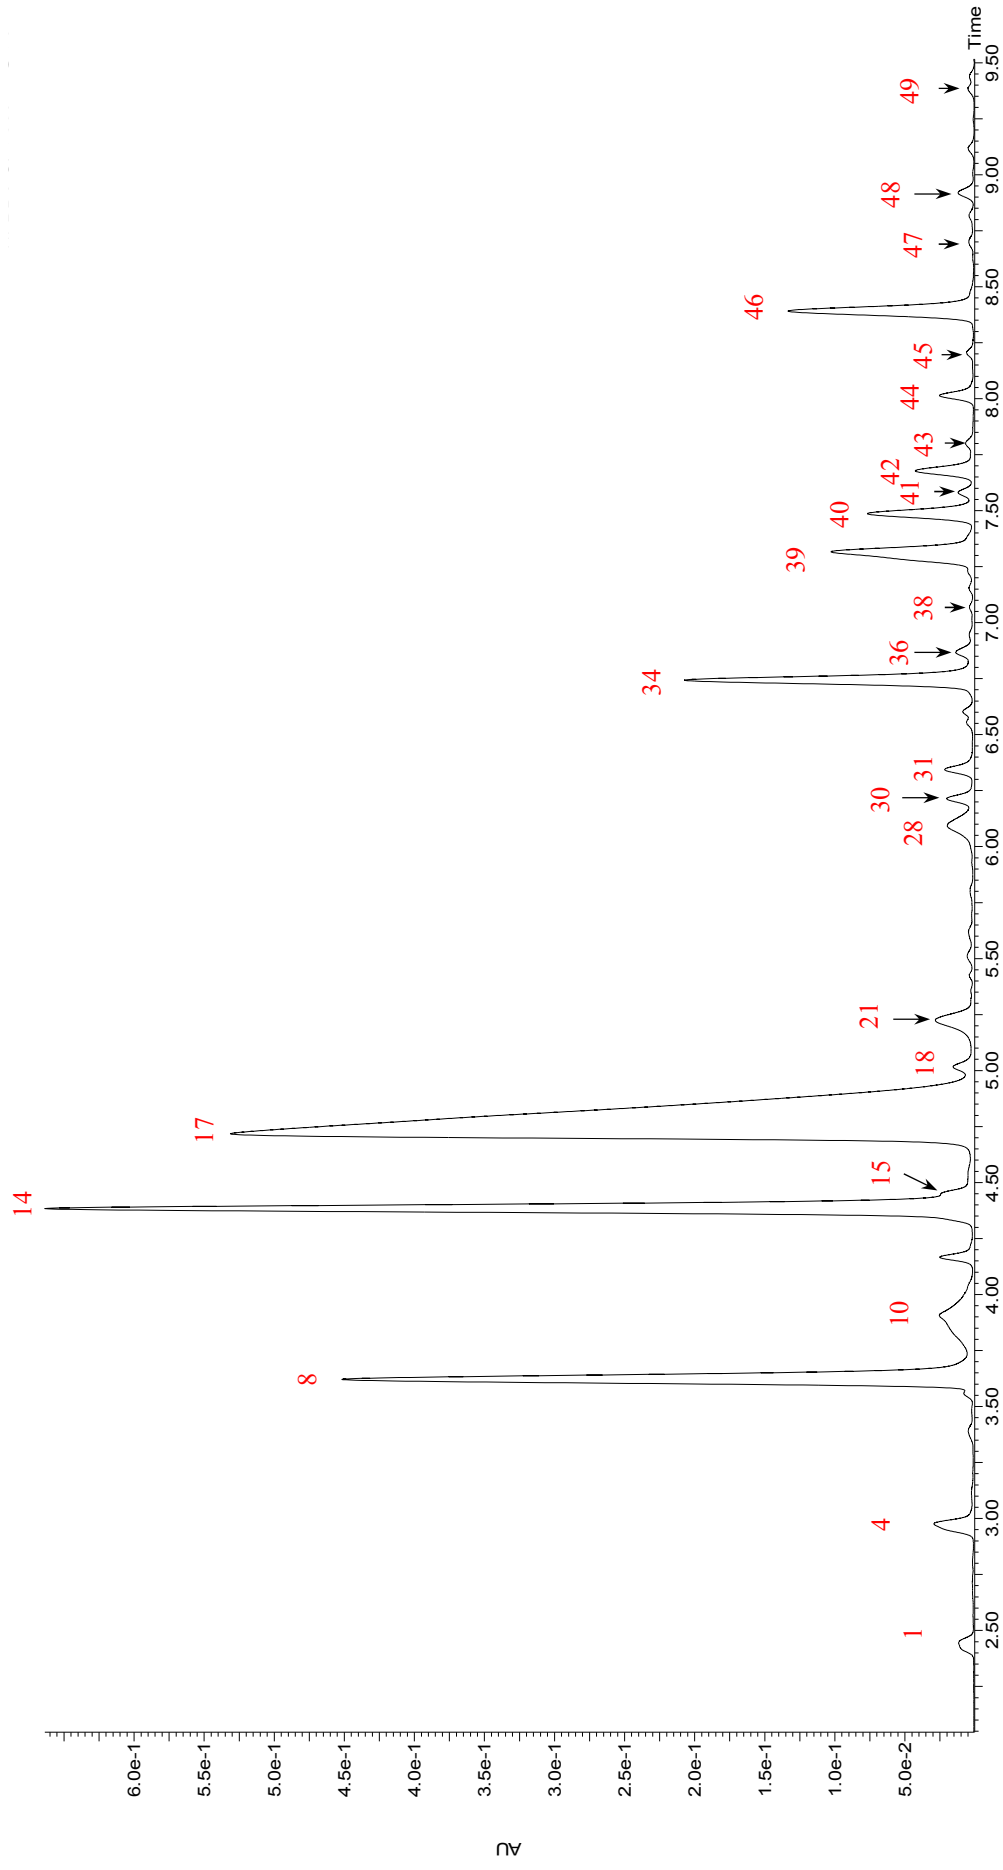

14

15 Fig. S2. UPLC-DAD chromatogram (360 nm) of compounds of methanolic extract from honeysuckle berries. The peak number corresponds to the  
16 number in Tables 1.

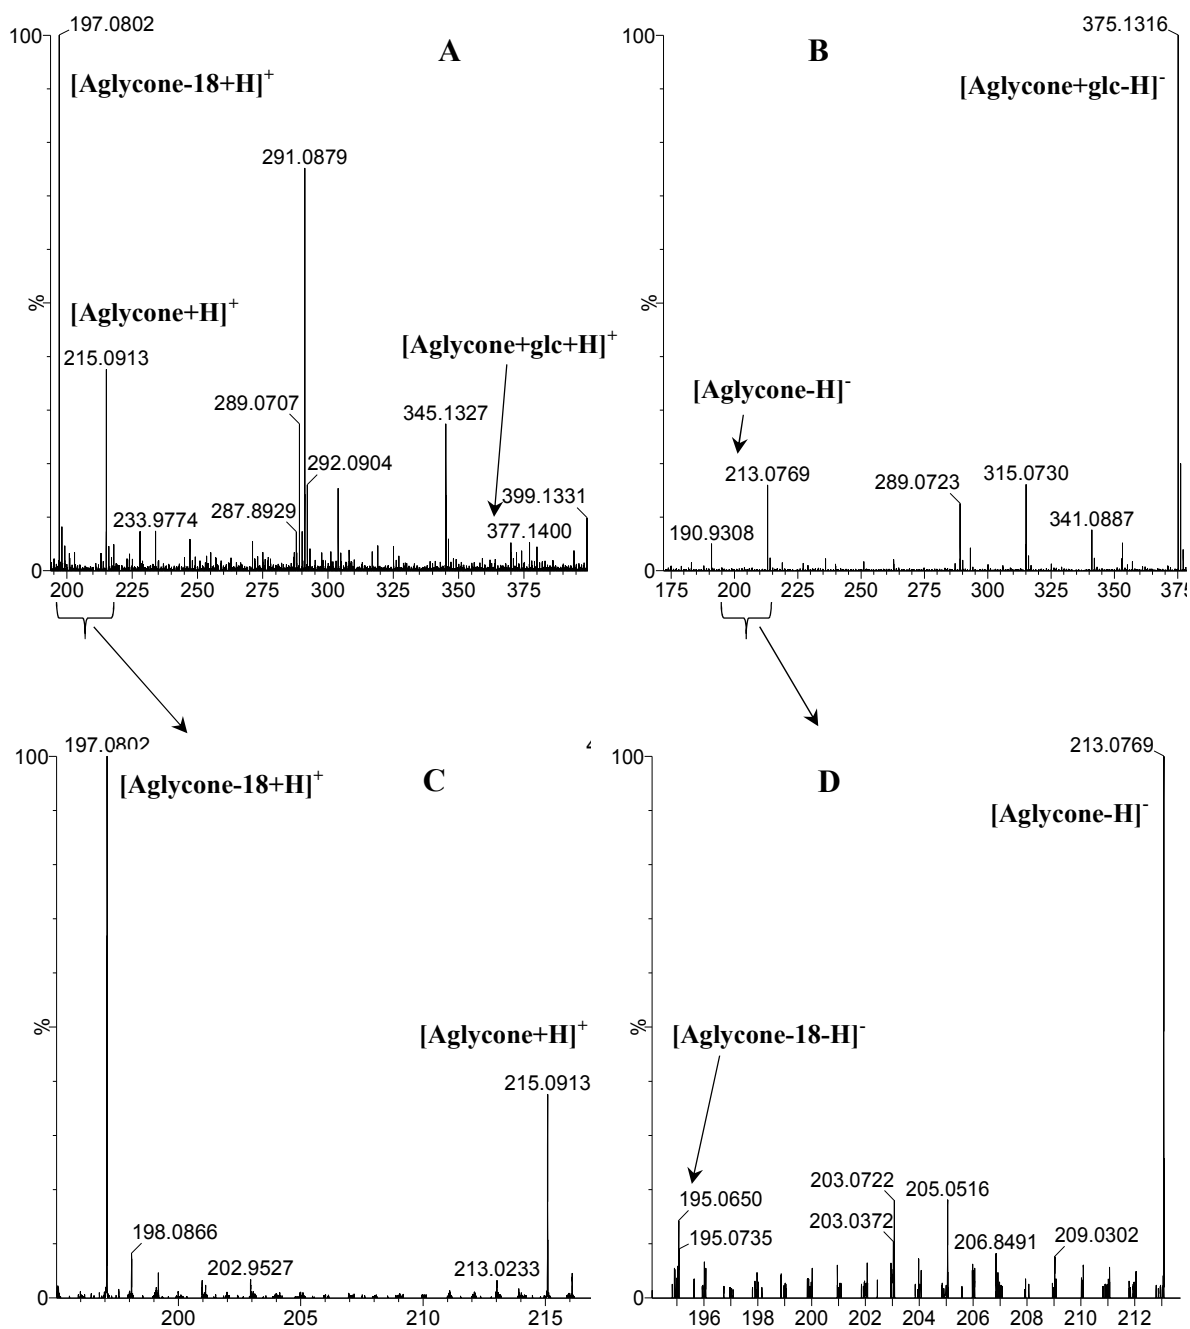

**Figure S3.** Mass spectra of the pseudomolecular and fragment ions of 8-*epi*-loganic acid (3) in positive (A, C) and negative (B, D) mode.

18

19

20

21

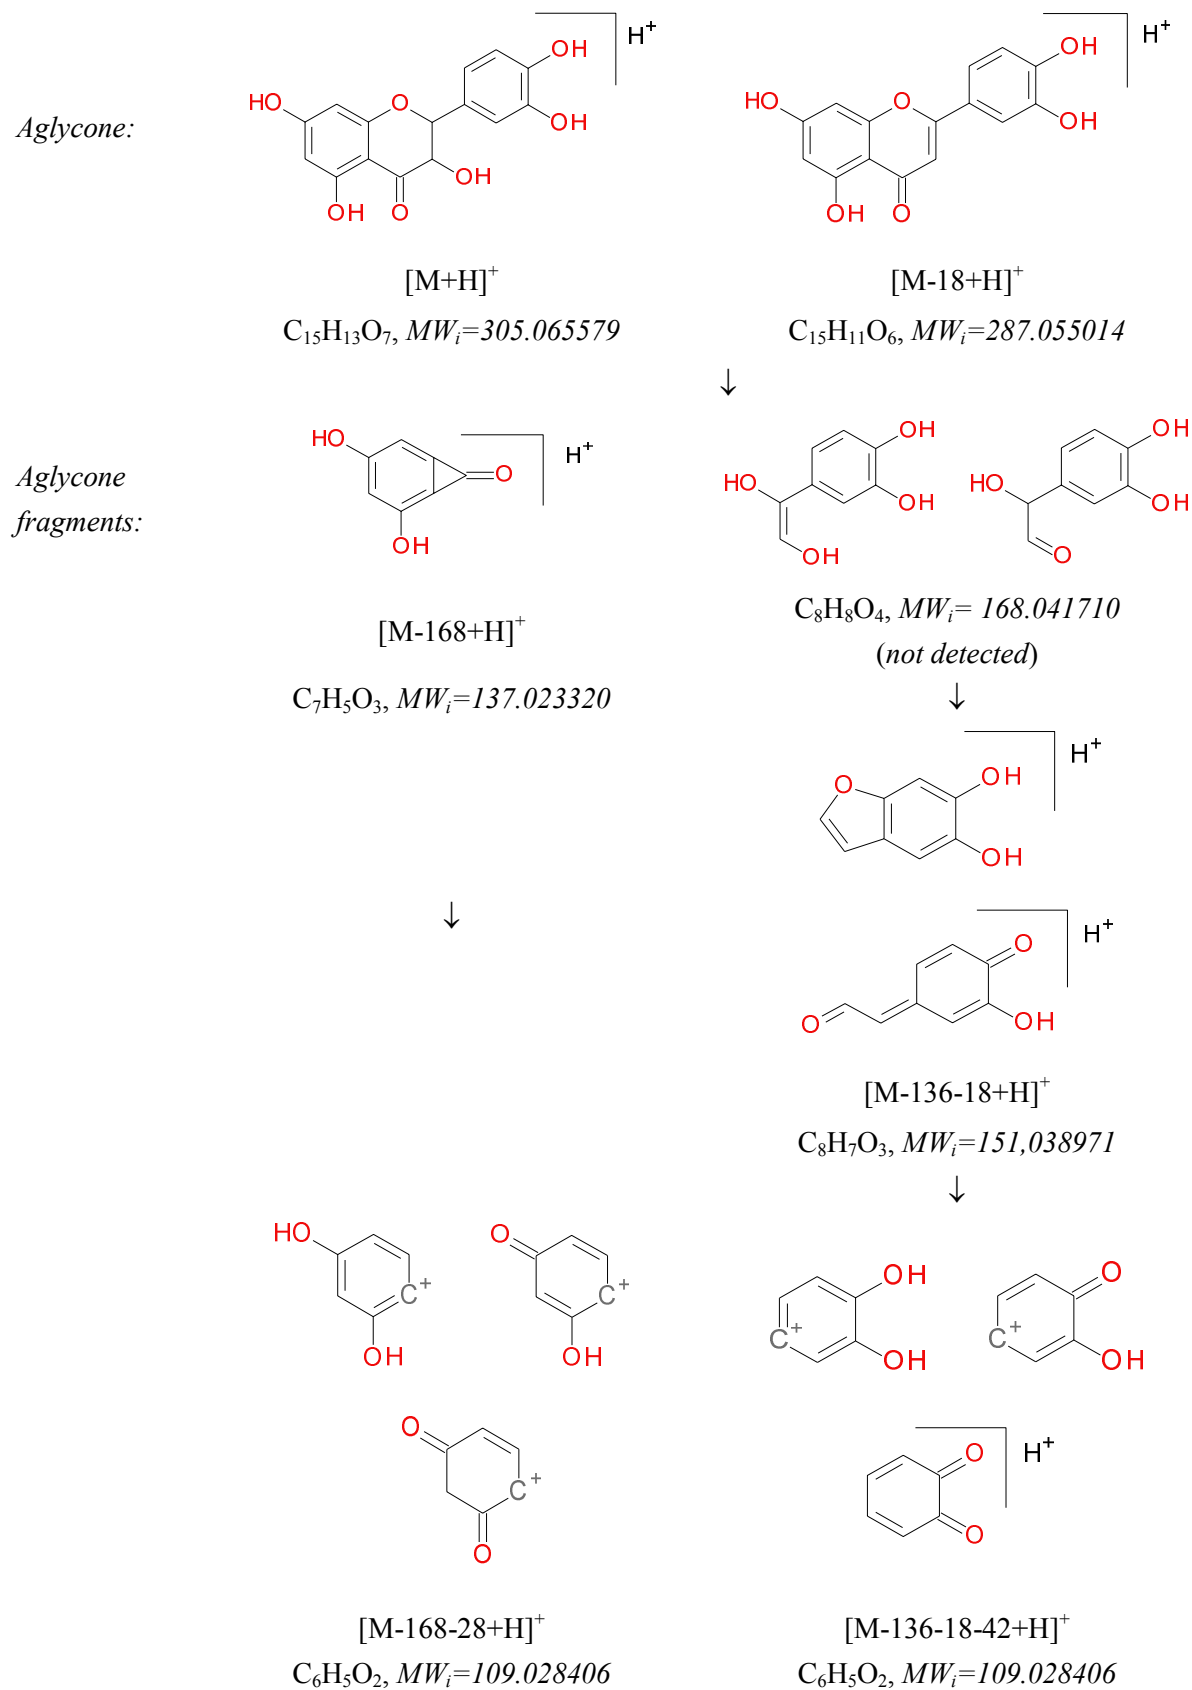

22

23 **Figure S4.** Structures of taxifolin glycosides fragment ions identified in positive mode (Assignment:  $MW_i$ ,  
24 monoisotopic molecular weight; -18, water; -28, C=O; -42, H<sub>2</sub>C=C=O/ethenone).

25

26  
27**Table S1.** Mass errors of taxyfolin (aglycone) pseudomolecular ion and its fragment ions according to Figure S4

| Formula [M+H] <sup>+</sup>                     | <i>MW</i> <sub>i</sub><br>detected [Da] | <i>MW</i> <sub>i</sub><br>calculated [Da] | Mass error<br>[ppm] |
|------------------------------------------------|-----------------------------------------|-------------------------------------------|---------------------|
| C <sub>15</sub> H <sub>13</sub> O <sub>7</sub> | 305.0649                                | 305.065579                                | 2.2                 |
| C <sub>15</sub> H <sub>11</sub> O <sub>6</sub> | 287.0536                                | 287.055014                                | 4.9                 |
| C <sub>7</sub> H <sub>5</sub> O <sub>3</sub>   | 137.0236                                | 137.023320                                | 2.0                 |
| C <sub>8</sub> H <sub>7</sub> O <sub>3</sub>   | 151.0394                                | 151.038971                                | 2.8                 |
| C <sub>6</sub> H <sub>5</sub> O <sub>2</sub>   | 109.0287                                | 109.028406                                | 2.7                 |

28  
2930  
31**Table S2.** Correlation between main active compounds and antioxidant activity of blue honeysuckle berries.

|                       | DPPH | FRAP |
|-----------------------|------|------|
| Total of iridoids     | 0.23 | 0.22 |
| Total of anthocyanins | 0.78 | 0.94 |

32

33  
34**Table S3.** Linear range, calibration curve, correlation coefficient R, LOD, and LOQ data for six used standards.

| Standard                         | Linear range<br>(µg/mL) | $\lambda_{\text{det}}^1$<br>(nm) | Calibration curve  | Correlation coefficient<br>R | LOD<br>(µg/mL) | LOQ<br>(µg/mL) |
|----------------------------------|-------------------------|----------------------------------|--------------------|------------------------------|----------------|----------------|
| Cyanidin 3- <i>O</i> -glucoside  | 10 – 75                 | 520                              | $y=1.204x-0.931^2$ | 0.9995                       | 0.086          | 0.283          |
| Quercetin 3- <i>O</i> -glucoside | 20 – 150                | 360                              | $y=0.606x-1.687$   | 0.9995                       | 0.060          | 0.185          |
| Luteolin 7- <i>O</i> -glucoside  | 20 – 150                | 360                              | $y=0.928x+1.468$   | 0.9996                       | 0.041          | 0.135          |
| 5- <i>O</i> -Caffeoylquinic      | 20 – 300                | 320                              | $y=1.083x+0.819$   | 0.9999                       | 0.060          | 0.199          |
| Loganic acid                     | 20 – 300                | 245                              | $y=0.361x+0.341$   | 0.9998                       | 1.748          | 5.769          |
| Loganin                          | 20 – 200                | 245                              | $y=0.438x+0.743$   | 0.9998                       | 1.168          | 3.853          |

35

<sup>1</sup> $\lambda_{\text{det}}$  detection wavelength in quantification process.

36

<sup>2</sup>y - peak area, x - concentration.

37
